# Supplementary material for: Linked-read based analysis of the medulloblastoma genome
Source: PubMed Central journal article supplement (PMC10419201; doi:10.3389/fonc.2023.1221611), 2023-07-28
Supplement: DataSheet_1.pdf [file DataSheet_1.pdf]

## Linked-read based analysis of the Medulloblastoma Genome

Melissa Zwaig<sup>1</sup>, Michael J Johnston<sup>2</sup>, John JY Lee<sup>4,5</sup>, Hamza Farooq<sup>6</sup>, Marco Gallo<sup>2</sup>, Nada Jabado<sup>3</sup>, Michael D. Taylor<sup>7,8\*</sup>, Jiannis Ragoussis<sup>1\*</sup>

<sup>1</sup> Victor Phillip Dahdaleh Institute of Genomic Medicine and Department of Human Genetics, McGill University, Montreal, Canada

<sup>2</sup> Alberta Children's Hospital Research Institute, Arnie Charbonneau Cancer Institute, and Department of Biochemistry and Molecular Biology, Cumming School of Medicine, University of Calgary, Calgary, AB T2N 4N1, Canada

<sup>3</sup> Department of Human Genetics, Department of Pediatrics, and The Research Institute of the McGill University Health Centre, Montreal, Canada

<sup>4</sup> Department of Pathology and Center for Cancer Research, Massachusetts General Hospital and Harvard Medical School, Boston, MA 02114, USA

<sup>5</sup> Broad Institute of Harvard and MIT, Cambridge, MA 02142, USA

<sup>6</sup> BioBox Analytics Inc., Toronto, ON. 88 College St, Toronto, ON M5G 1L4

<sup>7</sup> Division of Neurosurgery, The Arthur and Sonia Labatt Brain Tumour Research Centre and the Developmental and Stem Cell Biology Program, The Hospital for Sick Children, Toronto, ON, Canada

<sup>8</sup> Texas Children's Cancer Center, Hematology-Oncology Section and Department of Pediatrics – Hematology/Oncology and Neurosurgery, Baylor College of Medicine

\* **Correspondence:** Jiannis Ragoussis (Email: [ioannis.ragoussis@mcgill.ca](mailto:ioannis.ragoussis@mcgill.ca), Phone: +1 514-398-6508), Michael D. Taylor (Email: [mdt.cns@gmail.com](mailto:mdt.cns@gmail.com), Phone +1 832-824-4032)

### 1 Supplementary Data

Supplementary\_data.xlsx contains the following tables:

Additional Table 1 – Extraction methods and QC metrics for all 10X-LR and TELL-Seq datasets

Additional Table 2 – Manually validated somatic structural variant calls made across callers and the 10X-LR, WGS, ONT and PacBio datasets

Additional Table 3 – Validation of point mutations in 10X-LR, WGS and RNA-Seq data

Additional Table 4 – All structural variant calls across all linked-read technologies and callers

### 2 Supplementary Figures

**Supplemental Figure 1. Detection of novel variants in G4 medulloblastomas.** Circos plot for 10X-LR datasets showing (a) a complex event involving chromosomes 2 and 16 with a breakpoint in IDH1 in MDT-AP-2878. Outer circle shows allele frequency, as calculated by TitanCNA, where colour indicates the type of copy number change relative to the normal sample. Inner circle shows manually confirmed somatic SVs detected by 10X-LR and/or WGS and/or ONT and/or PacBio, where colour indicates the type of SV. 10X-LR data supporting (b) an SV with a breakpoint downstream of IDH1 in MDT-AP-2878, (c) the amplification of TERT in MDT-AP-2940, visualization of the

barcode overlap shown as heat maps in Loupe. Axes represent genomic regions and the colour of the points represents the number of barcodes that map to both of these regions. **(d)** TERT promoter mutation in MDT-AP-2130.

**Supplemental Figure 2. Validation of ecDNA using Hi-C data.** Hi-C interaction matrix showing that two regions of chromosome 2 (15Mb and 42Mb) interact with the entirety of chromosome 2 indicating oncogenic amplification via ecDNA

**Supplemental Figure 3. Copy number changes across G4 medulloblastomas.** Copy number profiles of all G4 medulloblastomas across chromosome 17 (a) and throughout the whole genome (b), allele frequency calculated by TitanCNA and plotted using KaryotypeR in R.

**Supplemental Figure 4. Detection of structural variants in G3 and SHH medulloblastomas.** (a) 10X-LR data supporting an interchromosomal SV between chromosomes 3 and 14 in MDT-AP-3724, visualization of the barcode overlap shown as heat maps in Loupe. Axes represent genomic regions and the colour of the points represents the number of barcodes that map to both of these regions. (b) Copy number profile for MDT-AP-3724, calculated and plotted with TitanCNA. (c) 10X-LR data supporting an interchromosomal SV between chromosomes 7 and 18 in MDT-AP-3862, visualization of the barcode overlap shown as heat maps in Loupe. Axes represent genomic regions and the colour of the points represents the number of barcodes that map to both of these regions. (d) Copy number profile for MDT-AP-3862, calculated and plotted with TitanCNA. 10X-LR data supporting a germline interchromosomal structural variant in MDT-AP-4037 between chromosomes 2 and 5 in (e) the tumor and (f) the blood, visualization of the barcode overlap shown as heat maps in Loupe. Axes represent genomic regions and the colour of the points represents the number of barcodes that map to both of these regions.

**Supplemental Figure 5. Comparison of 10x Genomics and Universal Sequencing Technologies' linked-read protocols.** Coverage profiles for chromosome 1 using WGS, 10X-LR and TELL-Seq data, coverage calculated using BVAtools depthofcoverage and plotted using the karyoploteR.

**Supplemental Figure 6. Detection of copy number changes and structural variants for all medulloblastomas.** Circos plots for 10X-LR datasets showing the copy number profile and manually confirmed structural variants of 21 G4 MBs, 2 G3 MBs and 2 SHH MBs. Outer circle shows allele frequency, as calculated by TitanCNA, where colour indicates the type of copy number change relative to the normal sample. Inner circle shows manually confirmed somatic SVs detected by 10X-LR and/or WGS and/or ONT and/or PacBio, colour indicates the type of SV.

Supplemental Table 1. Sample information and dataset availability

| Sample      | Age   | Sex | Diagnosis | Linked-reads | Illumina WGS | RNA-Seq    | PacBio       | Nanopore     | TELL-Seq   |
|-------------|-------|-----|-----------|--------------|--------------|------------|--------------|--------------|------------|
| MDT-AP-0074 | 3.29  | M   | Group 4   | Tumor-Normal | Tumor-Normal | Tumor only | Tumor-Normal |              |            |
| MDT-AP-1206 | 1     | F   | Group 4   | Tumor-Normal | Tumor-Normal | Tumor only |              |              | Tumor only |
| MDT-AP-1209 | 8     | M   | Group 4   | Tumor-Normal | Tumor-Normal | Tumor only |              |              |            |
| MDT-AP-1367 | 8.13  | M   | Group 4   | Tumor-Normal | Tumor-Normal | Tumor only | Tumor-Normal | Tumor-Normal |            |
| MDT-AP-1405 | 8.79  | M   | Group 4   | Tumor-Normal | Tumor-Normal |            | Tumor-Normal | Tumor-Normal |            |
| MDT-AP-2075 | 7     | F   | Group 4   | Tumor-Normal | Tumor-Normal | Tumor only | Tumor-Normal |              |            |
| MDT-AP-2078 | 5.4   | F   | Group 4   | Tumor-Normal |              |            |              |              |            |
| MDT-AP-2130 | 9     | M   | Group 4   | Tumor-Normal | Tumor-Normal | Tumor only |              |              |            |
| MDT-AP-2151 | 13.47 | M   | Group 4   | Tumor-Normal | Tumor-Normal | Tumor only |              |              |            |
| MDT-AP-2407 | 6     | M   | Group 4   | Tumor-Normal | Tumor-Normal | Tumor only |              |              |            |
| MDT-AP-2638 | NA    | M   | Group 4   | Tumor-Normal |              | Tumor only |              |              |            |
| MDT-AP-2673 | 10.1  | F   | Group 4   | Tumor-Normal | Tumor-Normal | Tumor only | Tumor-Normal | Tumor only   | Tumor only |
| MDT-AP-2849 | 10    | F   | Group 4   | Tumor-Normal | Tumor-Normal | Tumor only |              |              |            |
| MDT-AP-2857 | 12    | M   | Group 4   | Tumor-Normal |              | Tumor only |              |              |            |
| MDT-AP-2859 | 17    | M   | Group 4   | Tumor-Normal | Tumor-Normal | Tumor only |              |              |            |
| MDT-AP-2878 | 9     | M   | Group 4   | Tumor-Normal | Tumor-Normal |            |              |              | Tumor only |
| MDT-AP-2940 | 22    | F   | Group 4   | Tumor-Normal |              |            |              |              | Tumor only |
| MDT-AP-3670 | 7     | M   | Group 4   | Tumor-Normal |              |            |              |              |            |
| MDT-AP-3716 | 15    | F   | Group 4   | Tumor-Normal |              |            |              |              |            |
| MDT-AP-3743 | 6     | M   | Group 4   | Tumor-Normal |              |            |              |              |            |
| MDT-AP-3769 | 3     | F   | Group 4   | Tumor-Normal |              |            |              |              |            |
| MDT-AP-3667 | 11.3  | F   | Group 3   | Tumor-Normal |              |            |              |              |            |
| MDT-AP-4037 | 9.5   | M   | Group 3   | Tumor-Normal |              |            |              |              |            |
| MDT-AP-3724 | 14    | F   | SHH       | Tumor-Normal |              |            |              |              |            |
| MDT-AP-3862 | 2     | M   | SHH       | Tumor-Normal |              |            |              |              |            |

Tumor-Normal indicates that datasets for both the tumor and corresponding blood or normal tissue were generated with the technology  
Tumor only indicates that only a dataset from the tumor was generated with that technology

# Supplemental Figure 1

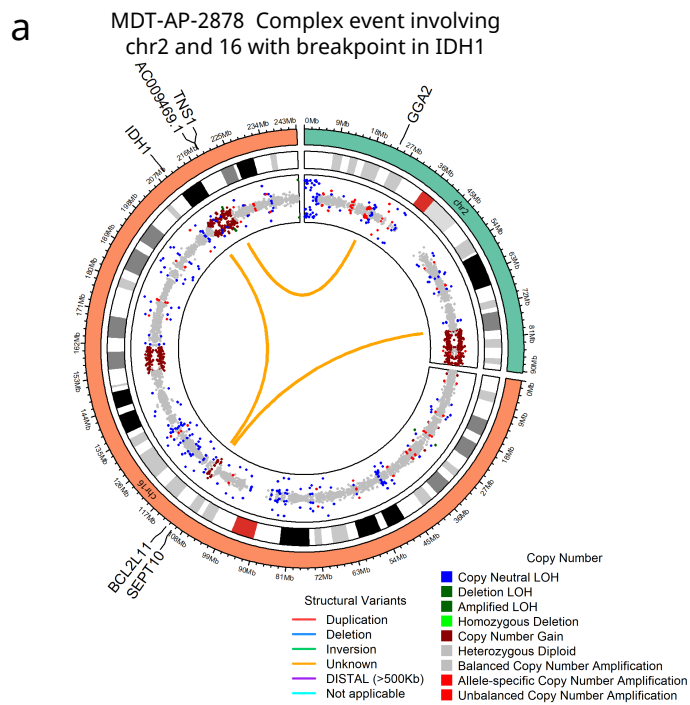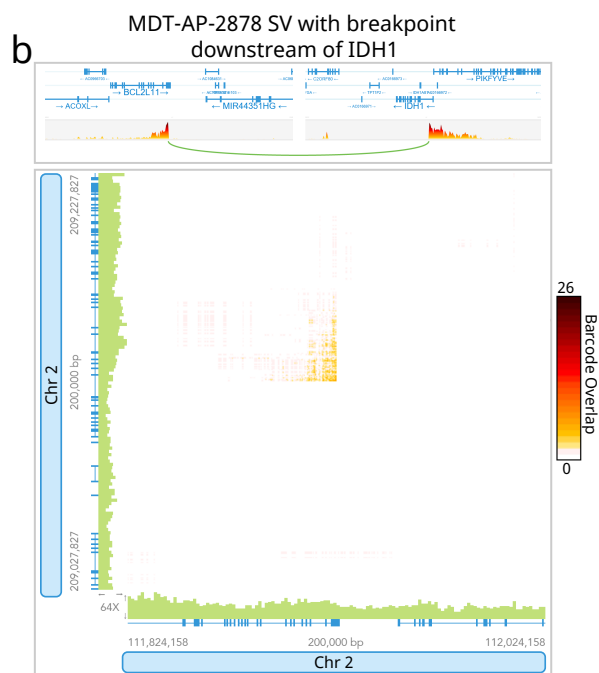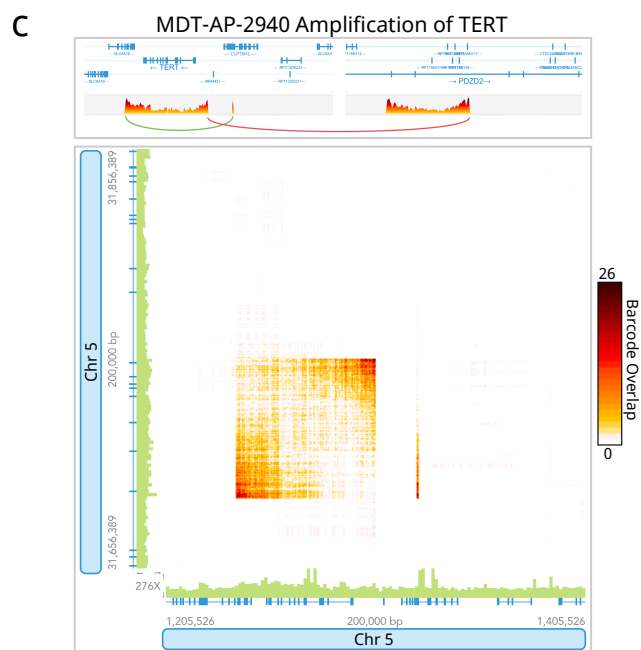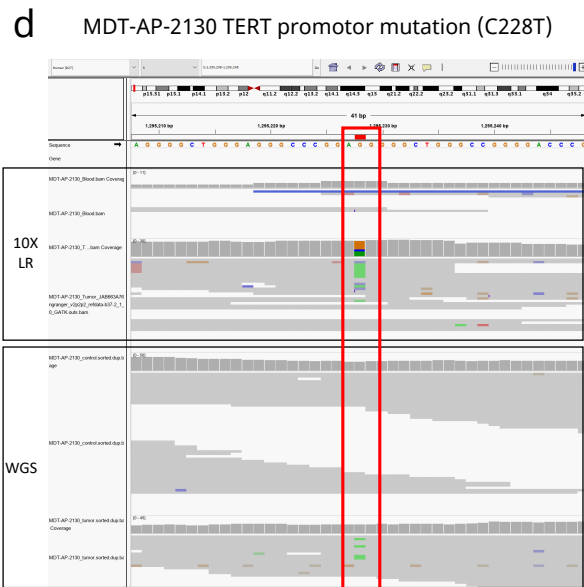

# Supplemental Figure 2

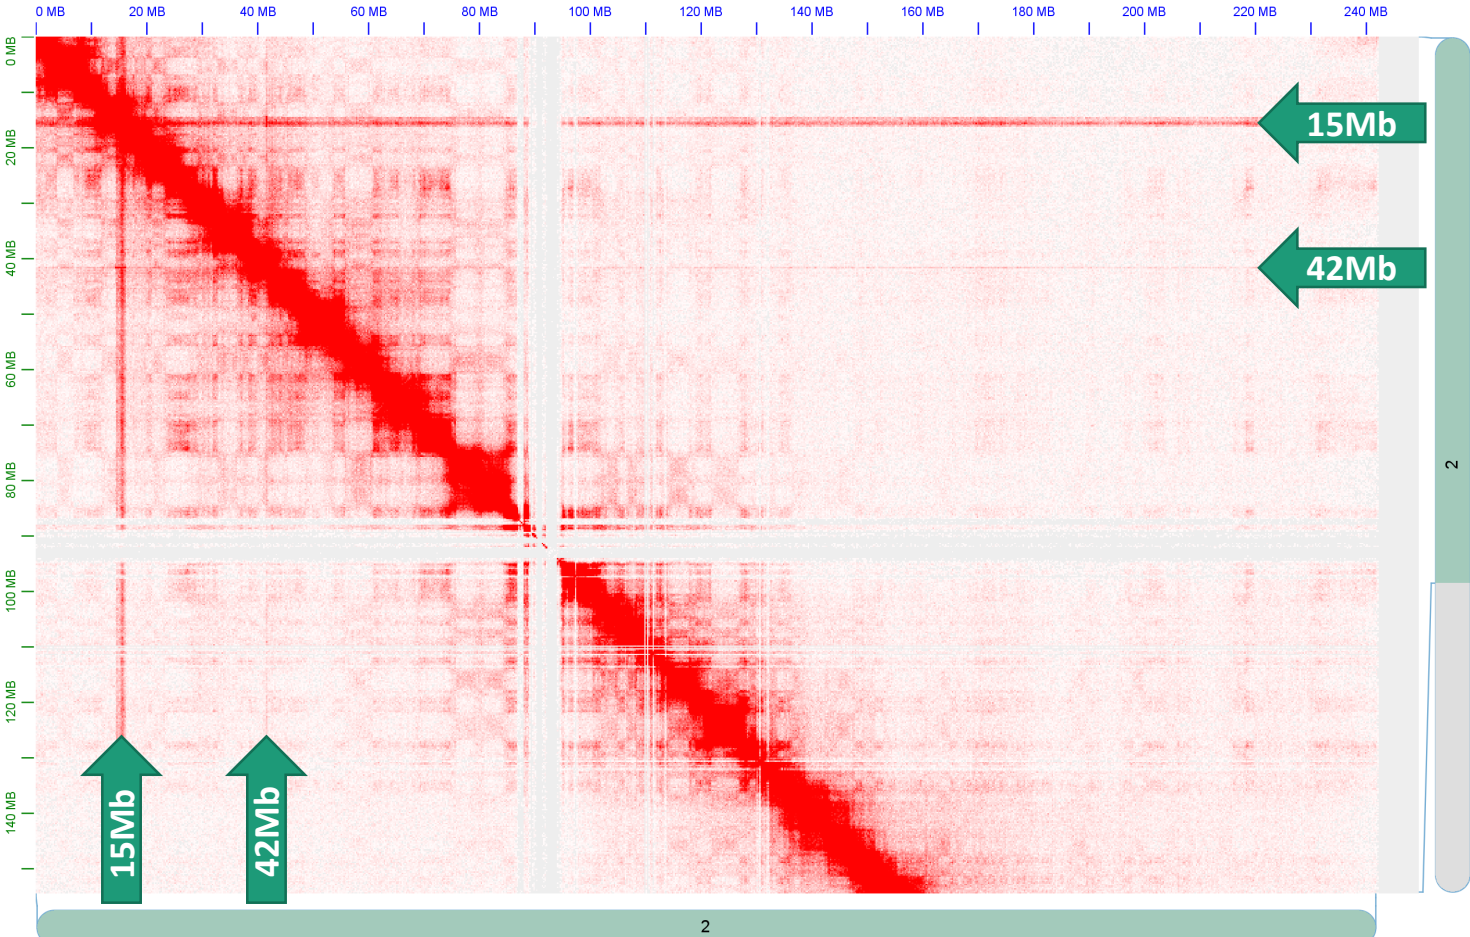

# Supplemental Figure 3

a

Chromosome 17

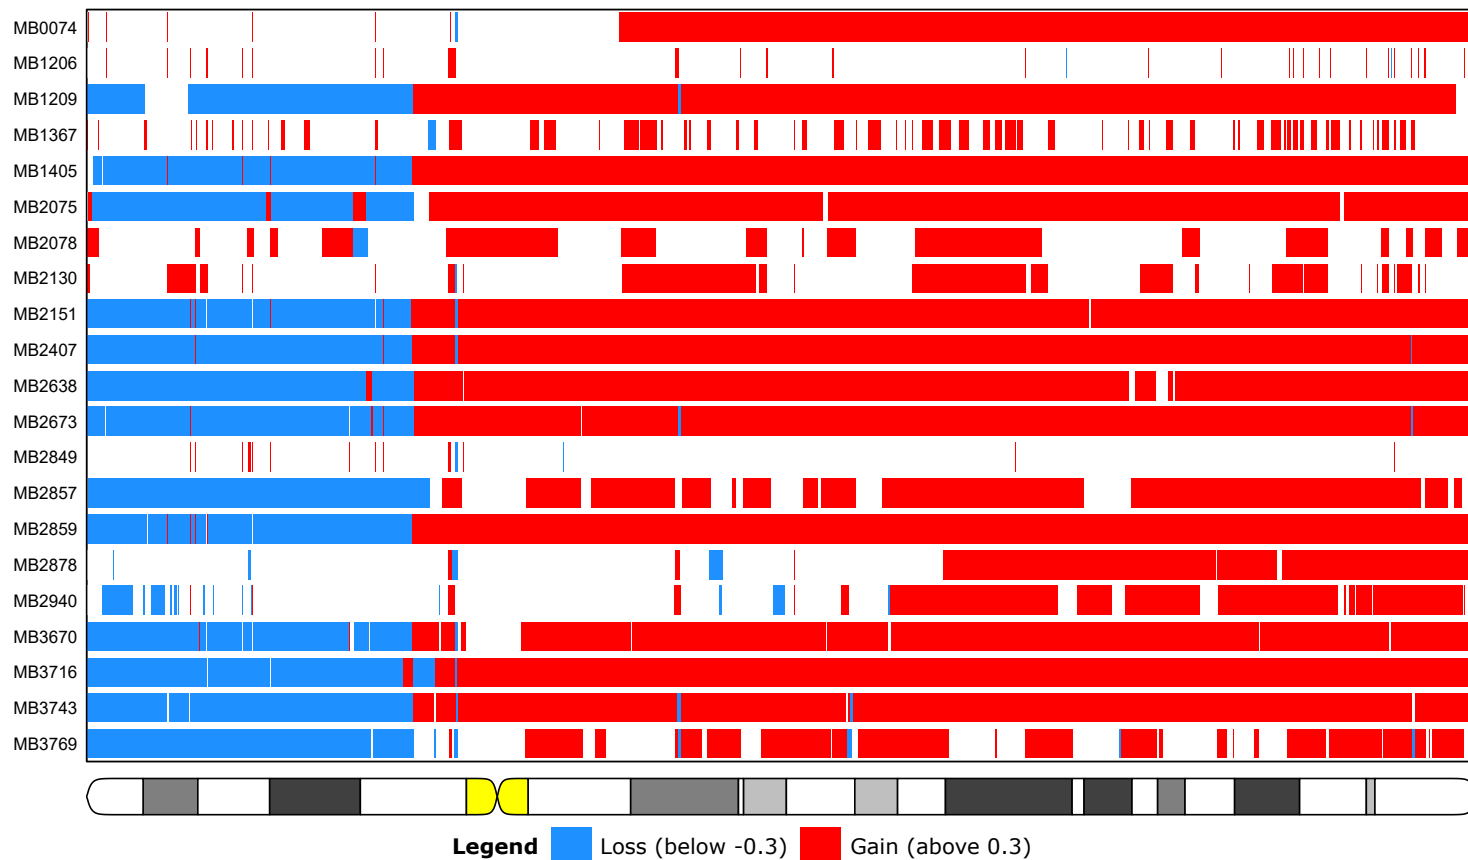

b

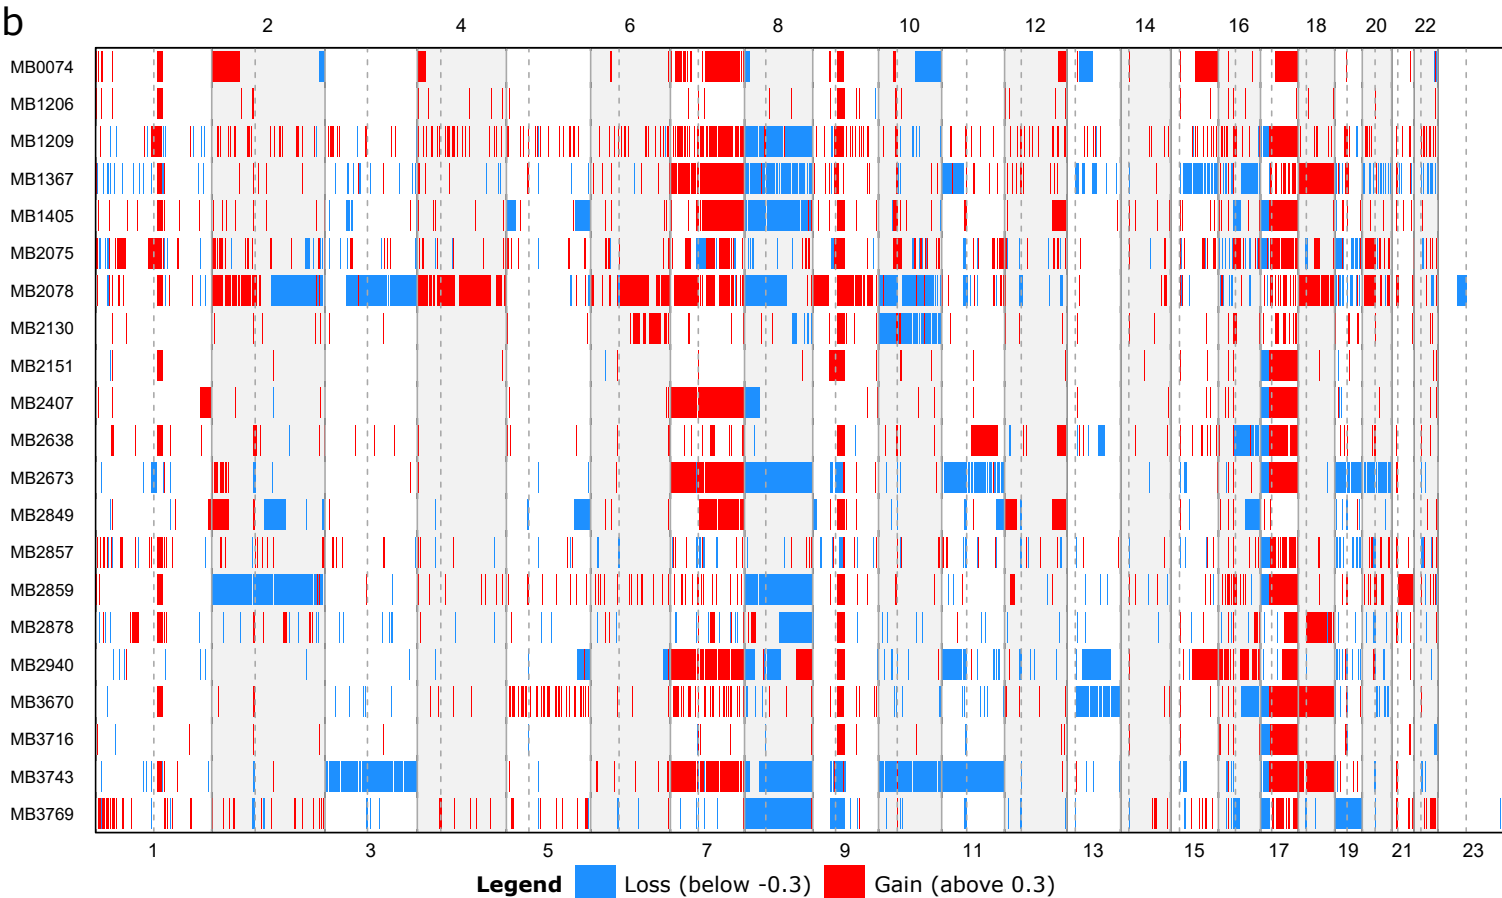

# Supplemental Figure 4

**a** MDT-AP-3724 SV between chr3 and 14

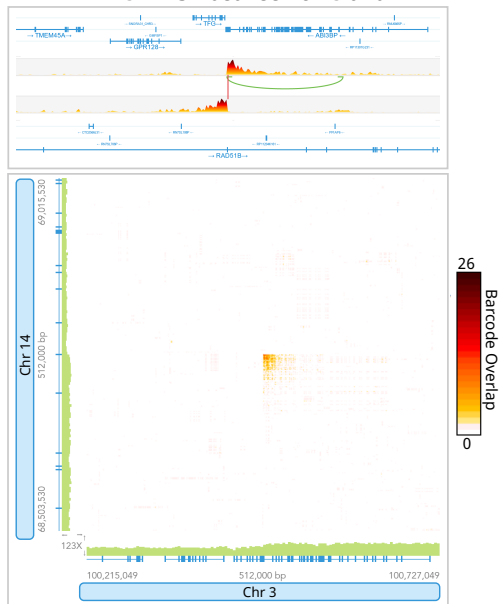

**b**

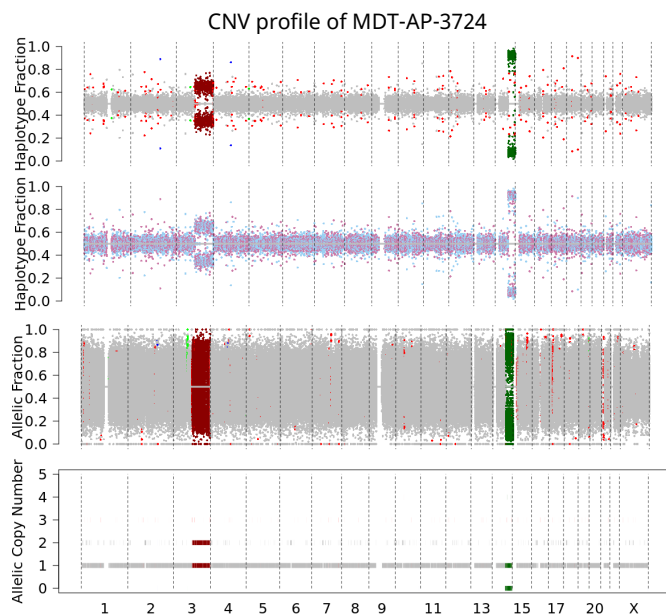

**c** MDT-AP-3862 SV between chr7 and 18

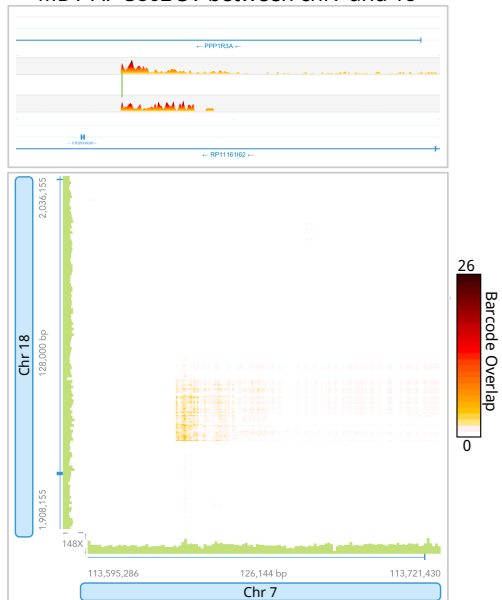

**d**

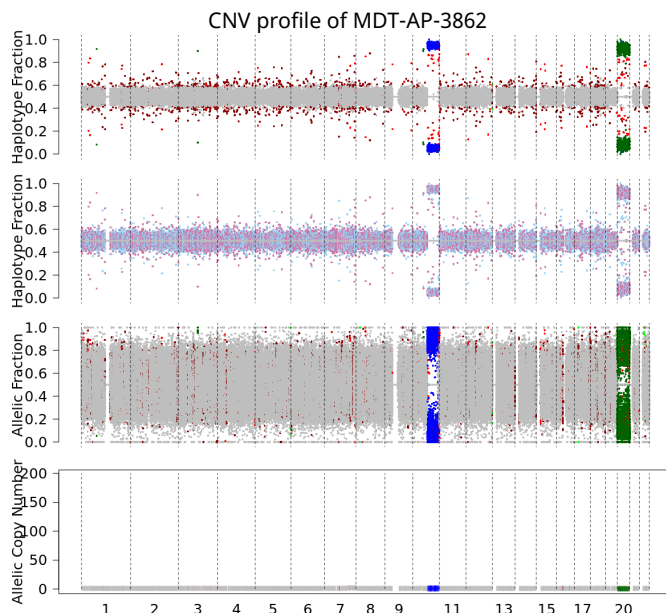

**e** Tumor MDT-AP-4037 Germline SV between chr2 and 5

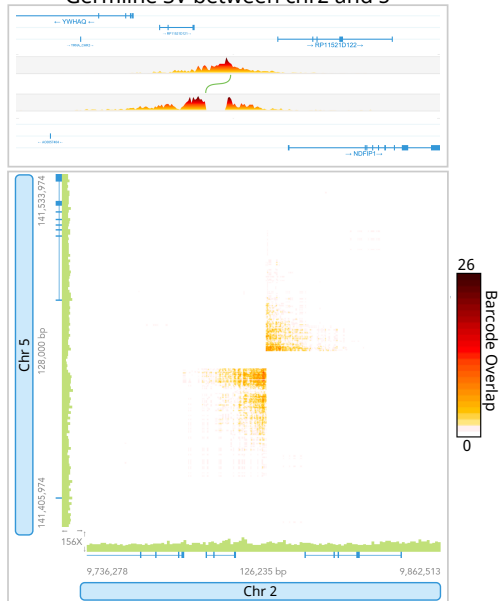

**f**

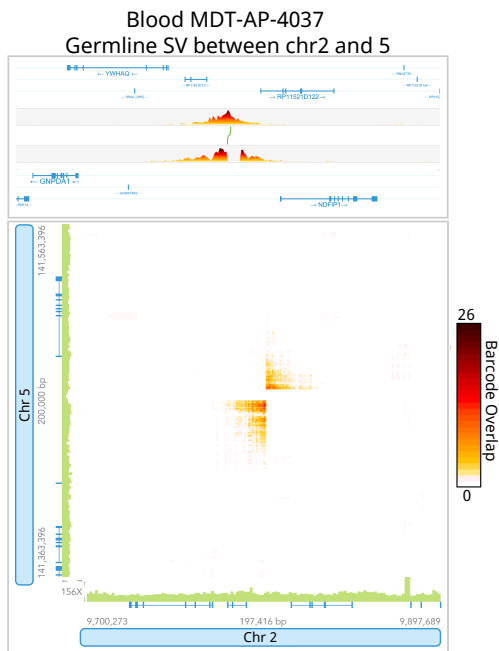

Supplemental Table 2. Comparison of QC metrics between 10X-LR and TELL-Seq

| Sample      | 10X Genomics                         |             |                          |                           |            |                    |                     |                            | TELL-Seq                             |             |                          |                           |            |                    |                     |                            |
|-------------|--------------------------------------|-------------|--------------------------|---------------------------|------------|--------------------|---------------------|----------------------------|--------------------------------------|-------------|--------------------------|---------------------------|------------|--------------------|---------------------|----------------------------|
|             | Extraction and Size selection method | SNPs phased | Longest phase block (Mb) | Mean molecule length (kb) | Mean depth | Num large SV calls | Num short deletions | Corrected loaded Mass (ng) | Extraction and Size selection method | SNPs phased | Longest phase block (Mb) | Mean molecule length (kb) | Mean depth | Num large SV calls | Num short deletions | Corrected loaded Mass (ng) |
| MDT-AP-1206 | PurGene                              | 99.12%      | 2.78Mb                   | 23.4kb                    | 37.84X     | 1180               | 4132                | 1.08                       | Same extraction as 10X-LR            | 95.79%      | 1.91Mb                   | 19.94kb                   | 34.37X     | 1792               | 3649                | 0.145                      |
| MDT-AP-2673 | Circulomics                          | 99.42%      | 32.03Mb                  | 93.89kb                   | 37.74X     | 231                | 4918                | 1.553                      | Same extraction as 10X-LR            | 97.78%      | 4.25Mb                   | 47.96kb                   | 35.48X     | 292                | 3584                | 0.289                      |
| MDT-AP-2878 | PurGene and SRE Circulomics          | 97.74%      | 4.00Mb                   | 34.44kb                   | 30.45X     | 674                | 8232                | 0.417                      | Same extraction as 10X-LR            | 96.77%      | 3.05Mb                   | 35.5kb                    | 34.28X     | 587                | 3718                | 0.255                      |
| MDT-AP-2940 | PurGene                              | 99.64%      | 9.74Mb                   | 30.98kb                   | 99.13X     | 196                | 3925                | 1.669                      | Same extraction as 10X-LR            | 95.51%      | 5.95Mb                   | 30.46kb                   | 36.32X     | 971                | 4510                | 0.712                      |

Supplemental Figure 5

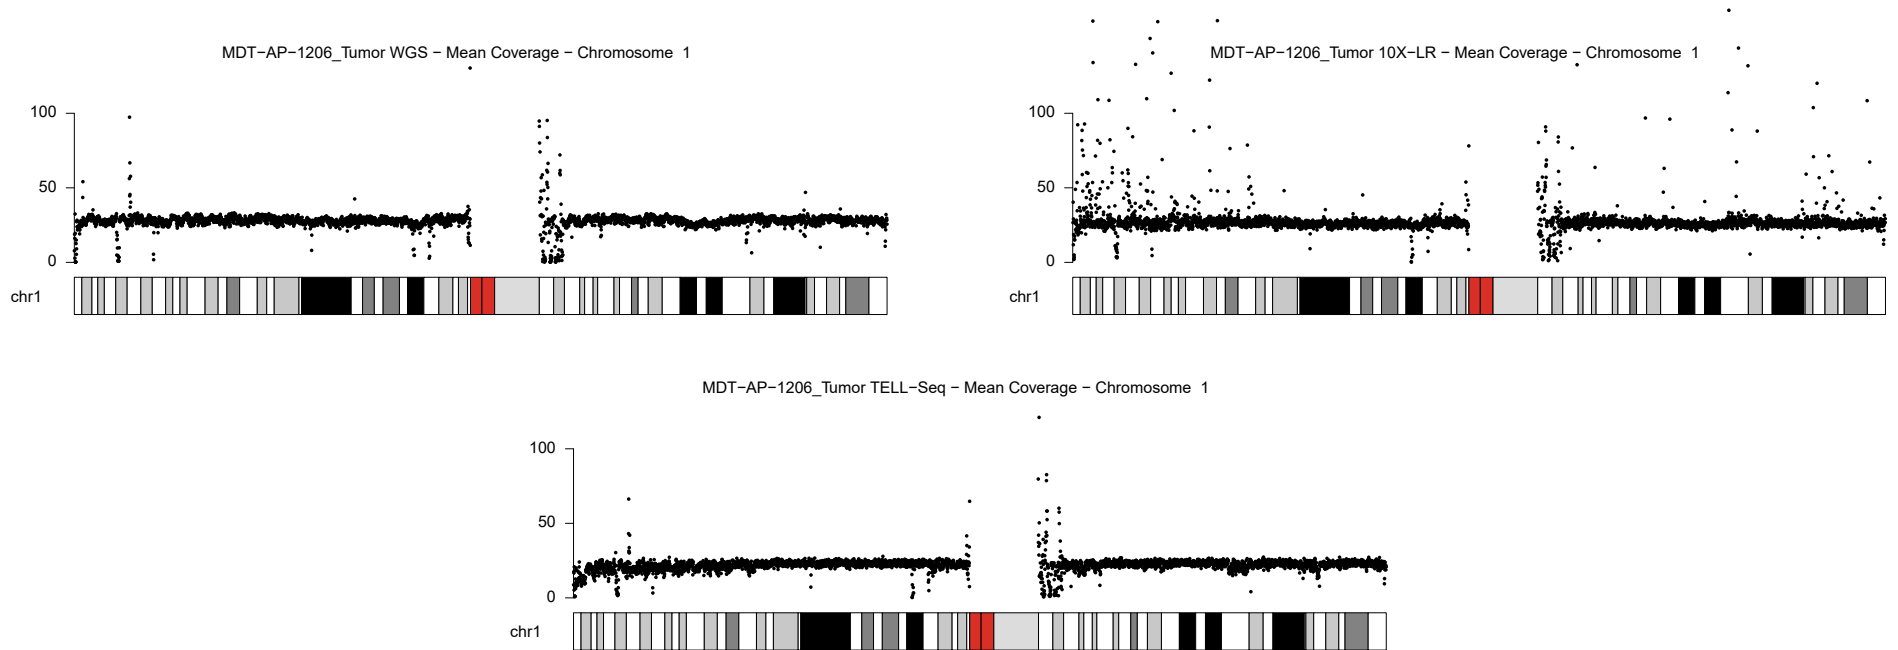



# Supplemental Figure 6

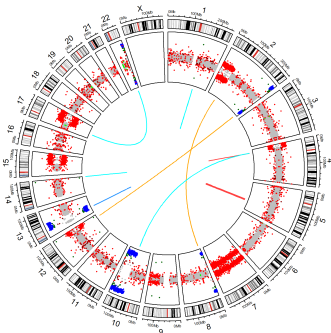

MDT-AP-0074  
G4 Medulloblastoma

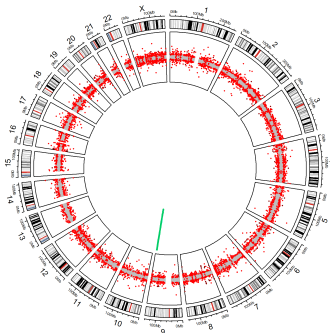

MDT-AP-1206  
G4 Medulloblastoma

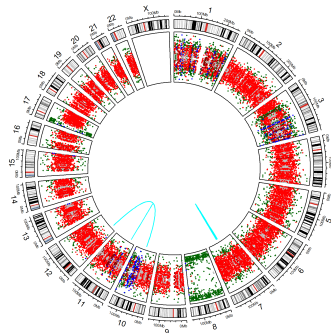

MDT-AP-1209  
G4 Medulloblastoma

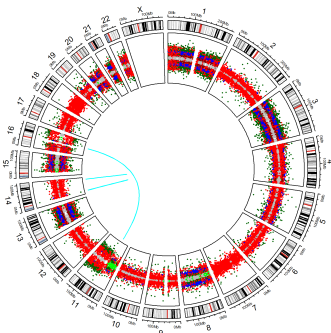

MDT-AP-1367  
G4 Medulloblastoma

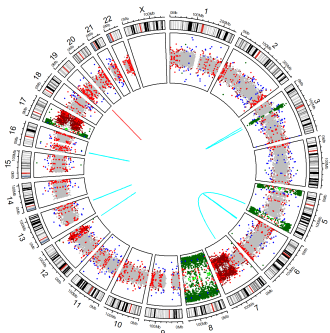

MDT-AP-1405  
G4 Medulloblastoma

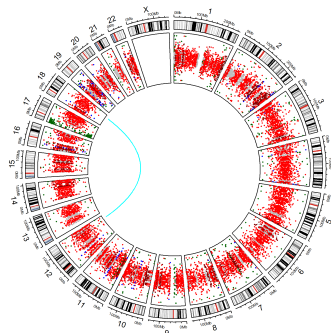

MDT-AP-2075  
G4 Medulloblastoma

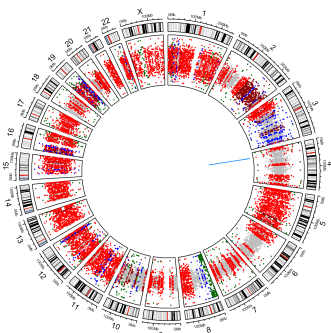

MDT-AP-2078  
G4 Medulloblastoma

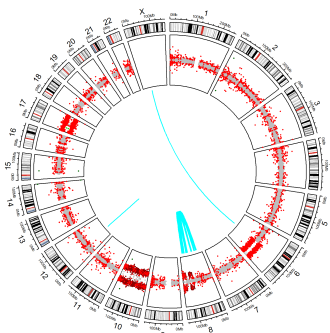

MDT-AP-2130  
G4 Medulloblastoma

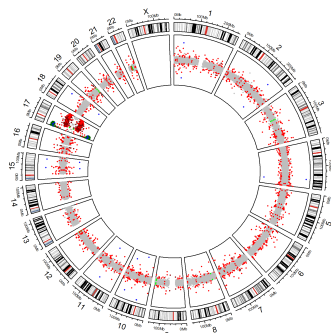

MDT-AP-2151  
G4 Medulloblastoma

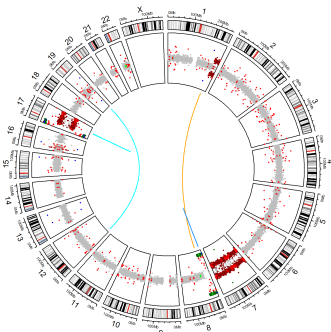

MDT-AP-2407  
G4 Medulloblastoma

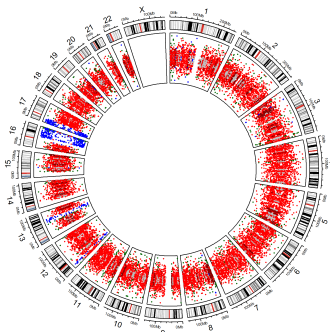

MDT-AP-2638  
G4 Medulloblastoma

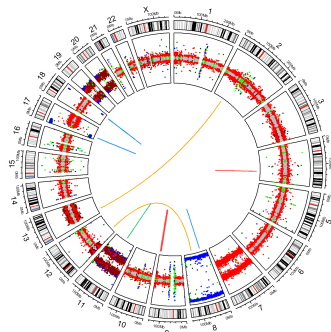

MDT-AP-2673  
G4 Medulloblastoma

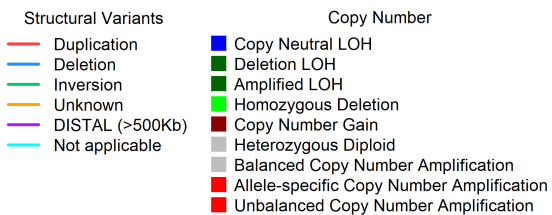

# Supplemental Figure 6 Cont.

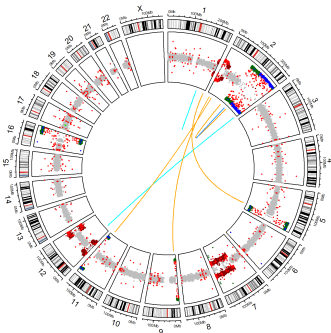

MDT-AP-2849  
G4 Medulloblastoma

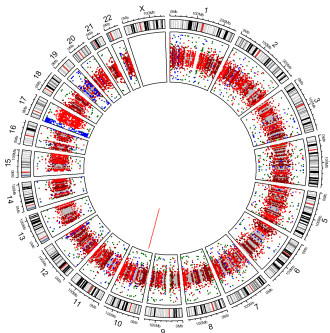

MDT-AP-2857  
G4 Medulloblastoma

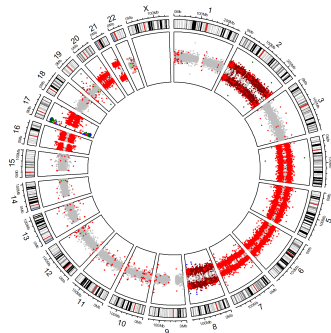

MDT-AP-2859  
G4 Medulloblastoma

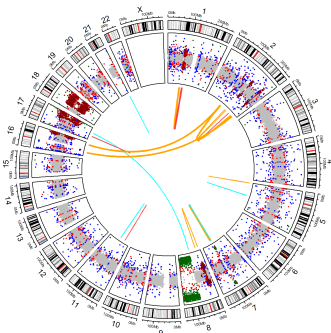

MDT-AP-2878  
G4 Medulloblastoma

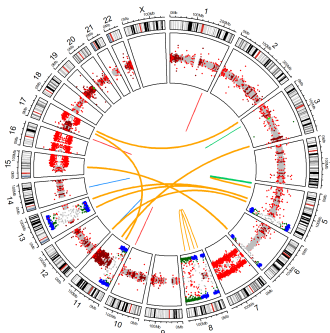

MDT-AP-2940  
G4 Medulloblastoma

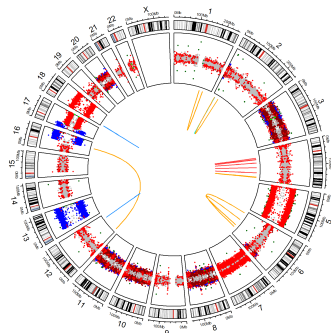

MDT-AP-3670  
G4 Medulloblastoma

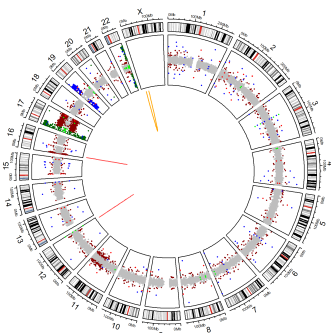

MDT-AP-3716  
G4 Medulloblastoma

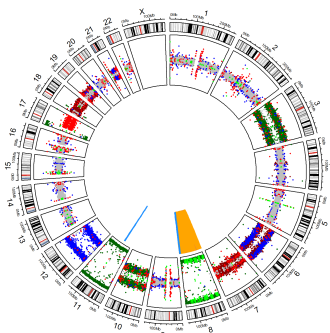

MDT-AP-3743  
G4 Medulloblastoma

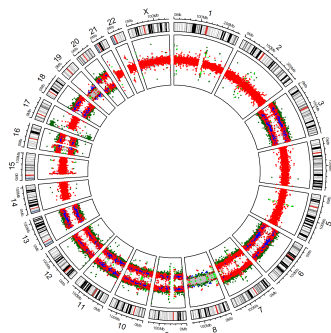

MDT-AP-3769  
G4 Medulloblastoma

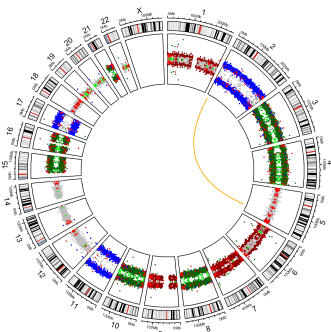

MDT-AP-4037  
G3 Medulloblastoma

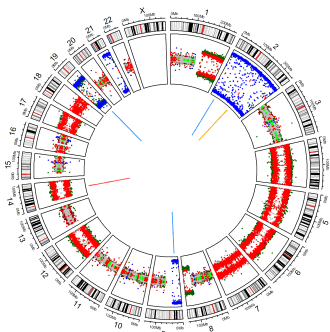

MDT-AP-3667  
G3 Medulloblastoma

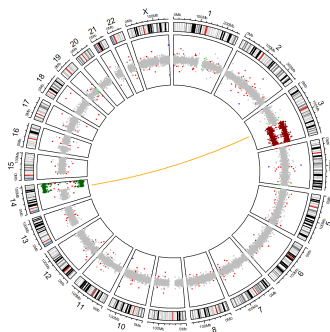

MDT-AP-3724  
SHH Medulloblastoma

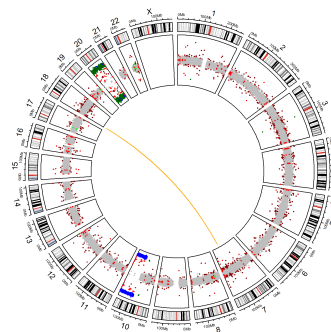

MDT-AP-3862  
SHH Medulloblastoma

### Structural Variants

- Duplication
- Deletion
- Inversion
- Unknown
- DISTAL (>500Kb)
- Not applicable

### Copy Number

- Copy Neutral LOH
- Deletion LOH
- Amplified LOH
- Homozygous Deletion
- Copy Number Gain
- Heterozygous Diploid
- Balanced Copy Number Amplification
- Allele-specific Copy Number Amplification
- Unbalanced Copy Number Amplification
